# Supplementary material for: Protein Oxidative Damage at the Crossroads of Cellular Senescence, Aging, and Age-Related Diseases
Source: Hindawi journal article supplement (doi:10.1155/2012/919832), 2012-01-01
Supplement: f1 [file 919832.f1.pdf]

**Supplementary Table.** Modified proteins by carbonylation, AGE and HNE identified during aging and age related diseases.

| Protein                                                          | Species                             | Organ / Tissue                | Condition / Model                             | Reference #                   |
|------------------------------------------------------------------|-------------------------------------|-------------------------------|-----------------------------------------------|-------------------------------|
| Alpha-enolase                                                    | Human, Mice                         | Brain, Cerebellum             | Alzheimer, Parkinson, Lewy Bodies, Huntington | 2, 3, 4, 6, 9, 11, 17, 20, 34 |
| Glyceraldehyde-3-phosphate dehydrogenase                         | Human, Mice, Rat                    | Brain, Liver, Eyes            | Alzheimer, Lewy Bodies, Huntington, Aging     | 2, 3, 13, 14, 31, 34          |
| Actin, cytoplasmic 1                                             | Human, Mice, Mongolian gerbils, Rat | Brain, Bronchoalveolar fluid  | Alzheimer, Huntington, Aging                  | 2, 6, 11, 10, 17, 25, 30, 34  |
| Triosephosphate isomerase                                        | Human, Mice                         | Brain                         | Alzheimer                                     | 2, 13, 20, 34                 |
| Dihydropyrimidinase-related protein 2                            | Human, Mice                         | Brain, Spinal cord            | Alzheimer, ALS, Aging                         | 6, 13, 9, 10, 17, 22, 33,     |
| ATP synthase subunit alpha, mitochondrial                        | Human, Mice                         | Brain                         | Alzheimer, Huntington                         | 2, 11, 34                     |
| Glutamine synthetase                                             | Human, Mice, Rat                    | Brain, Eyes                   | Alzheimer, Glaucoma, Aging                    | 2, 6, 9, 14, 17, 31, 34       |
| Fructose-bisphosphate aldolase A                                 | Human, Mice                         | Brain                         | Alzheimer, Aging                              | 3, 7, 10, 33, 65              |
| Glial fibrillary acidic protein                                  | Human, Mice                         | Brain                         | Alzheimer, Huntington                         | 6, 9, 10, 15, 27, 34          |
| Voltage-dependent anion-selective channel protein 1              | Human                               | Brain                         | Alzheimer                                     | 2, 34                         |
| Heat shock cognate 71 kDa protein                                | Human, Mice                         | Brain                         | Alzheimer, Huntington                         | 2, 4, 30                      |
| Ubiquitin carboxyl-terminal hydrolase isozyme L1                 | Human                               | Brain, Cerebellum             | Alzheimer, Parkinson                          | 2, 14, 34                     |
| Phosphatidylethanolamine-binding protein 1                       | Human, Mice                         | Brain, Liver                  | Alzheimer, Aging                              | 2, 11, 34                     |
| Superoxide dismutase [Cu-Zn]                                     | Human, Mice, Rat                    | Brain, Cerebellum, Liver      | Alzheimer, ALS, Aging                         | 34, 51, 29, 33                |
| ATP synthase subunit beta, mitochondrial                         | Human, Rat                          | Brain, Skeletal Muscle        | Alzheimer, Diabetes                           | 6, 7, 31                      |
| Elongation factor Tu, mitochondrial                              | Human                               | Brain                         | Alzheimer                                     | 11, 10, 34                    |
| 78 kDa glucose-regulated protein                                 | Human, Mice                         | Brain, Liver                  | Alzheimer, Aging                              | 31, 28                        |
| Dystrophin-related protein 2                                     | Human, Mice                         | Brain                         | Alzheimer, aging                              | 2, 4, 20, 25                  |
| Gamma-enolase                                                    | Human                               | Brain                         | Alzheimer                                     | 2, 6, 34                      |
| Glutamate dehydrogenase 1, mitochondrial                         | Human, Mongolian gerbils            | Brain                         | Alzheimer                                     | 6, 7, 15                      |
| 60 kDa heat shock protein, mitochondrial                         | Human, Rat                          | Brain                         | Alzheimer                                     | 6, 13                         |
| Carbonic anhydrase 2                                             | Human                               | Brain, Cerebellum             | Alzheimer                                     | 2, 27                         |
| Fructose-bisphosphate aldolase C                                 | Human, Mice                         | Brain                         | Alzheimer, Huntington                         | 7, 15, 27                     |
| Pyruvate kinase isozymes M1/M2                                   | Human                               | Brain                         | Alzheimer, Huntington                         | 9, 11                         |
| Beta-enolase                                                     | Human                               | Brain                         | Alzheimer                                     | 2                             |
| Peroxioredoxin-1                                                 | Human, Rat                          | Brain                         | Huntington, Parkinson, Aging                  | 5, 15, 29                     |
| Aconitate hydratase, mitochondrial                               | Human                               | Brain                         | Alzheimer, Huntington,                        | 7, 15, 51, 34                 |
| Peroxioredoxin-6                                                 | Human                               | Brain                         | Parkinson, Huntington,                        | 5, 15, 34                     |
| Superoxide dismutase [Mn], mitochondrial                         | Human, Rat                          | Brain                         | Alzheimer, Aging                              | 29, 34                        |
| Peptidyl-prolyl cis-trans isomerase NIMA-interacting 1           | Human                               | Brain                         | Alzheimer                                     | 2, 9                          |
| Peroxioredoxin-2                                                 | Human, Mice                         | Brain                         | Alzheimer, Parkinson, Huntington              | 5, 15                         |
| Phosphoglycerate mutase 1                                        | Human, Rat                          | Brain                         | Alzheimer                                     | 13, 27                        |
| Neurofilament light polypeptide                                  | Human, Mice                         | Brain                         | Alzheimer, Aging                              | 6, 20                         |
| Vimentin                                                         | Human                               | Brain                         | Alzheimer                                     | 6                             |
| Malate dehydrogenase, cytoplasmic                                | Human, Rat                          | Brain, broncho alveolar fluid | Alzheimer, Aging                              | 7, 30                         |
| Cytochrome b-c1 complex subunit 1, mitochondrial                 | Human                               | Brain                         | Alzheimer                                     | 6                             |
| Actin, cytoplasmic 2                                             | Human, Mongolian gerbils            | Brain                         | Alzheimer                                     | 6, 15                         |
| Phosphoglucomutase-1                                             | Human                               | Brain                         | Alzheimer                                     | 3                             |
| Alpha-crystallin B chain                                         | Human                               | Brain                         | Alzheimer, Huntington                         | 16                            |
| Phosphoglycerate kinase 1                                        | Human                               | Brain                         | Alzheimer                                     | 11, 34                        |
| Heat shock 70 kDa protein 1A/1B                                  | Human                               | Brain                         | Alzheimer                                     | 1, 11, 27                     |
| Stress-70 protein, mitochondrial                                 | Human, Mice                         | Brain                         | Alzheimer                                     | 1, 12                         |
| Creatine Kinase BB                                               | Human                               | Brain                         | Alzheimer                                     | 14, 26                        |
| Tubulin alpha-4A chain                                           | Human                               | Brain                         | Alzheimer                                     | 6                             |
| Tubulin alpha-1C chain                                           | Human                               | Brain                         | Alzheimer                                     | 6                             |
| Tubulin beta-2C chain                                            | Human                               | Brain                         | Alzheimer                                     | 6                             |
| Tubulin beta chain                                               | Human                               | Brain                         | Alzheimer                                     | 25                            |
| L-lactate dehydrogenase C chain                                  | Human                               | Brain                         | Alzheimer                                     | 3                             |
| Guanine nucleotide-binding protein G(1)/G(S)/G(T) subunit beta-1 | Human                               | Brain                         | Alzheimer                                     | 6                             |
| Eukaryotic translation initiation factor 3 subunit J             | Human                               | Brain                         | Alzheimer                                     | 11                            |
| Leungin                                                          | Human, Rat                          | Brain                         | Alzheimer                                     | 13                            |
| L-lactate dehydrogenase A chain                                  | Human                               | Brain                         | Alzheimer                                     | 3                             |
| L-lactate dehydrogenase B chain                                  | Human                               | Brain                         | Alzheimer                                     | 2, 11                         |
| Proteasome subunit alpha type-1                                  | Human                               | Brain                         | Alzheimer                                     | 1, 10                         |
| Protein disulfide-isomerase                                      | Mice                                | Liver                         | Aging                                         | 18                            |
| Putative malate dehydrogenase 1B                                 | Rat                                 | Brain                         | Alzheimer                                     | 35                            |
| Cytoplasmic aconitate hydratase                                  | Human, Mice, Rat                    | Brain                         | Alzheimer                                     | 1                             |
| 9-3-3 protein zeta/delta                                         | Human, Mice, Rat                    | Brain                         | Alzheimer                                     | 1                             |
| Protein DJ-1                                                     | Human                               | Brain                         | Parkinson                                     | 36                            |
| Hemoglobin subunit beta                                          | Human, Mice, Rat                    | Brain                         | Alzheimer                                     | 1                             |
| 9-3-3 protein gamma                                              | Human, Mice, Rat                    | Brain                         | Alzheimer                                     | 1                             |
| Sodium/potassium-transporting ATPase subunit alpha-1             | Human, Mice, Rat                    | Brain                         | Alzheimer                                     | 1                             |
| Hippocampus abundant transcript-like protein 1                   | Human                               | Brain                         | Alzheimer                                     | 14                            |
| NADH-ubiquinone oxidoreductase                                   | Rat                                 | Skeletal Muscle               | Aging                                         | 41                            |
| NADH dehydrogenase (ubiquinone) Fe-S protein 7                   | Rat                                 | Skeletal Muscle               | Aging                                         | 41                            |
| Acetyl-CoA acetyltransferase                                     | Rat                                 | Skeletal Muscle               | Aging                                         | 41                            |
| Carbonyl reductase [NADPH]                                       | Human                               | Brain                         | Parkinson                                     | 11                            |
| Serine/threonine-protein kinase 8                                | Human, Mice, Rat                    | Brain                         | Alzheimer                                     | 1                             |
| Laminin subunit gamma-1                                          | Mice                                | Brain                         | Alzheimer                                     | 37                            |
| Calpain-8                                                        | Mice                                | Brain                         | Alzheimer                                     | 37                            |
| Beta-synuclein                                                   | Human                               | Brain                         | Parkinson                                     | 38                            |
| Pyruvate dehydrogenase E1 component subunit alpha, mitochondrial | Rat                                 | Brain                         | Alzheimer                                     | 13                            |
| V-type proton ATPase 116 kDa subunit a isoform 2                 | Human, Mice, Rat                    | Brain                         | Alzheimer                                     | 1                             |
| Syntaxin-binding protein 1                                       | Rat                                 | Brain                         | Alzheimer                                     | 13                            |
| Medium-chain specific acyl-CoA dehydrogenase, mitochondrial      | Human                               | Brain                         | Alzheimer                                     | 1                             |
| Short-chain specific acyl-CoA dehydrogenase, mitochondrial       | Human                               | Brain                         | Alzheimer                                     | 1                             |
| Transcription elongation factor SPT5                             | Human                               | Brain                         | Alzheimer                                     | 1                             |
| Serine/threonine-protein kinase SRPK1                            | Human                               | Brain                         | Alzheimer                                     | 1                             |
| Mitogen-activated protein kinase MLT                             | Human                               | Brain                         | Alzheimer                                     | 2                             |
| Transketolase                                                    | Human                               | Brain                         | Alzheimer                                     | 1                             |
| Long-chain-fatty-acid-CoA ligase 1                               | Rat                                 | Skeletal Muscle               | Aging                                         | 41                            |
| Propionyl-CoA carboxylase alpha chain                            | Rat                                 | Skeletal Muscle               | Aging                                         | 41                            |
| Prohibitin                                                       | Rat                                 | Skeletal Muscle               | Aging                                         | 41                            |
| Glutamate dehydrogenase                                          | Rat                                 | Skeletal Muscle, Liver        | Aging                                         | 41, 42                        |
| Short chain 3-hydroxyacyl-CoA dehydrogenase                      | Rat                                 | Skeletal Muscle               | Aging                                         | 41                            |
| Proteasome subunit beta type-4                                   | Human                               | Brain                         | Alzheimer                                     | 1                             |
| Glutathione S-transferase P                                      | Human                               | Brain                         | Huntington                                    | 16                            |
| Vesicle-fusing ATPase                                            | Human                               | Brain                         | Alzheimer                                     | 1                             |
| Catalase                                                         | Rat                                 | Liver                         | Aging                                         | 42                            |
| Ornithine carbamoyltransferase                                   | Rat                                 | Liver                         | Aging                                         | 42                            |
| Cathepsin D                                                      | Human                               | Brain                         | Pick                                          | 39                            |
| E3 ubiquitin-protein ligase parkin                               | Human                               | Brain                         | Parkinson                                     | 40                            |
| Tubulin alpha-1A chain                                           | Human                               | Brain                         | Alzheimer                                     | 6                             |
| Tubulin alpha-1B chain                                           | Human                               | Brain                         | Alzheimer                                     | 6                             |
| Succinate dehydrogenase (ubiquinone) iron-sulfur protein         | Rat                                 | Skeletal Muscle               | Aging                                         | 41                            |
| Carnitine O-acetyltransferase                                    | Rat                                 | Skeletal Muscle               | Aging                                         | 41                            |
| Guanine nucleotide-binding protein                               | Human                               | Brain                         | Alzheimer                                     | 6                             |
| 9-3-3 protein zeta/delta                                         | Human                               | Brain                         | Alzheimer                                     | 11                            |

|                                                             |             |                       |                |        |
|-------------------------------------------------------------|-------------|-----------------------|----------------|--------|
| Fibrinogen gamma chain                                      | Human       | Plasma                | Alzheimer      | 8      |
| Alpha-1-antitrypsin                                         | Human       | Plasma                | Alzheimer      | 8      |
| Gamma-soluble NSF attachment protein                        | Human       | Brain, Cerebellum     | Alzheimer      | 10     |
| 9-3-3 protein zeta/delta                                    | Rat         | Brain                 | Alzheimer      | 13     |
| Tubulin beta-2B chain                                       | Rat         | Brain                 | Alzheimer      | 13     |
| Tubulin alpha-1A chain                                      | Rat         | Brain                 | Alzheimer      | 13     |
| Beta-synuclein                                              | Rat         | Brain                 | Alzheimer      | 13     |
| Tubulin alpha-1B chain                                      | Human       | Brain                 | Huntington     | 16     |
| Glutathione peroxidase 1                                    | Human       | Brain                 | Huntington     | 16     |
| Glutathione peroxidase 6                                    | Human       | Brain                 | Huntington     | 16     |
| Ubiquinol-cytochrome-c reductase complex core protein       | Rat         | Skeletal Muscle       | Aging          | 41     |
| Aspartate aminotransferase                                  | Rat         | Skeletal Muscle       | Aging          | 41     |
| Trifunctional enzyme alpha subunit                          | Rat         | Skeletal Muscle       | Aging          | 41     |
| Trifunctional enzyme beta subunit                           | Rat         | Skeletal Muscle       | Aging          | 41     |
| Ferritin light chain                                        | Human       | Brain                 | Huntington     | 16     |
| Rab GDP dissociation inhibitor beta                         | Human       | Brain                 | Huntington     | 16     |
| Dynamin-1                                                   | Mice        | Brain                 | Aging          | 17     |
| L-lactate dehydrogenase B chain                             | Mice        | Brain                 | Aging          | 17     |
| Alpha-internexin                                            | Mice        | Brain                 | Aging          | 17     |
| Profilin-2                                                  | Mice        | Brain                 | Alzheimer      | 19     |
| Coronin-1A                                                  | Mice        | Brain                 | Alzheimer      | 19     |
| L-lactate dehydrogenase B chain                             | Mice        | Brain                 | Aging          | 20     |
| Heat shock protein HSP 50-alpha                             | Mice        | Brain                 | Aging          | 20     |
| Serotransferrin                                             | Mice        | Liver                 | Aging          | 21     |
| Serum albumin                                               | Mice        | Liver                 | Aging          | 21     |
| Formimidoyltransferase-cyclodeaminase                       | Mice        | Liver                 | Aging          | 21     |
| Selenin-binding protein 1                                   | Mice        | Liver                 | Aging          | 21     |
| Arginase-1                                                  | Mice        | Liver                 | Aging          | 21     |
| Sorbitol dehydrogenase                                      | Mice        | Liver                 | Aging          | 21     |
| Fructose-1,6-bisphosphatase 1                               | Mice        | Liver                 | Aging          | 21     |
| Regucalcin                                                  | Mice        | Liver                 | Aging          | 21     |
| Electron transfer flavoprotein subunit alpha, mitochondrial | Mice        | Liver                 | Aging          | 21     |
| Glutathione S-transferase Mu 1                              | Mice        | Liver                 | Aging          | 21     |
| Apolipoprotein A-1                                          | Mice        | Liver                 | Aging          | 21     |
| Heat shock 70 kDa protein 1A                                | Human, Mice | Brain, Spinal cord    | Alzheimer, ALS | 22, 34 |
| Neurofilament medium polypeptide                            | Human       | Brain                 | Alzheimer      | 24     |
| Cytochrome c oxidase subunit 5A, mitochondrial              | Human       | Brain                 | Alzheimer      | 24     |
| Cathepsin D                                                 | Human       | Brain                 | Alzheimer      | 24     |
| Peptidyl-prolyl cis-trans isomerase A                       | Human       | Brain                 | Alzheimer      | 24     |
| Septin-11                                                   | Human       | Brain                 | Alzheimer      | 24     |
| Malate dehydrogenase, mitochondrial                         | Human       | Brain                 | Alzheimer      | 25     |
| Mitogen-activated protein kinase 1                          | Human       | Brain                 | Alzheimer      | 27     |
| Syntaxin-binding protein 1                                  | Human       | Brain                 | Alzheimer      | 27     |
| Putative heat shock protein HSP 50-beta 2                   | Human       | Brain                 | Alzheimer      | 34     |
| Voltage-dependent anion-selective channel protein 1         | Human       | Brain                 | Alzheimer      | 34     |
| Pyruvate kinase isozymes R/L                                | Human       | Brain                 | Alzheimer      | 34     |
| L-lactate dehydrogenase B chain                             | Human       | Brain                 | Alzheimer      | 34     |
| Malate dehydrogenase, mitochondrial                         | Human       | Brain                 | Alzheimer      | 34     |
| Tubulin alpha-1A chain                                      | Human       | Brain                 | Alzheimer      | 34     |
| Eukaryotic translation initiation factor 4 gamma 1          | Human       | Brain                 | Alzheimer      | 34     |
| Cofilin-1                                                   | Rat         | Brain                 | Aging          | 29     |
| Peptidyl-prolyl cis-trans isomerase A                       | Rat         | Brain                 | Aging          | 29     |
| Adenylate kinase isoenzyme 1                                | Rat         | Brain                 | Aging          | 29     |
| 9-3-3 protein epsilon                                       | Rat         | Bronchoalveolar fluid | Aging          | 30     |
| 60S ribosomal protein L13                                   | Rat         | Bronchoalveolar fluid | Aging          | 30     |
| Actin, cytoplasmic 2                                        | Rat         | Bronchoalveolar fluid | Aging          | 30     |
| Serum albumin                                               | Rat         | Bronchoalveolar fluid | Aging          | 30     |
| Alpha-1-antitrypsinase                                      | Rat         | Bronchoalveolar fluid | Aging          | 30     |
| Alpha-1-inhibitor 3                                         | Rat         | Bronchoalveolar fluid | Aging          | 30     |
| Alpha-2-HS-glycoprotein                                     | Rat         | Bronchoalveolar fluid | Aging          | 30     |
| Annexin A5                                                  | Rat         | Bronchoalveolar fluid | Aging          | 30     |
| AP-2 complex subunit mu                                     | Rat         | Bronchoalveolar fluid | Aging          | 30     |
| Bifunctional protein NCOAT                                  | Rat         | Bronchoalveolar fluid | Aging          | 30     |
| Ceruloplasmin                                               | Rat         | Bronchoalveolar fluid | Aging          | 30     |
| Complement C3                                               | Rat         | Bronchoalveolar fluid | Aging          | 30     |
| Ferritin light chain 1                                      | Rat         | Bronchoalveolar fluid | Aging          | 30     |
| Fetuin-B                                                    | Rat         | Bronchoalveolar fluid | Aging          | 30     |
| Gelsolin                                                    | Rat         | Bronchoalveolar fluid | Aging          | 30     |
| Hemopexin                                                   | Rat         | Bronchoalveolar fluid | Aging          | 30     |
| Liver carboxylesterase 1                                    | Rat         | Bronchoalveolar fluid | Aging          | 30     |
| Macrophage-capping protein                                  | Rat         | Bronchoalveolar fluid | Aging          | 30     |
| Peroxiredoxin-6                                             | Rat         | Bronchoalveolar fluid | Aging          | 30     |
| Polymeric immunoglobulin receptor                           | Rat         | Bronchoalveolar fluid | Aging          | 30     |
| Protein Plunc                                               | Rat         | Bronchoalveolar fluid | Aging          | 30     |
| Pulmonary surfactant-associated protein A                   | Rat         | Bronchoalveolar fluid | Aging          | 30     |
| Pulmonary surfactant-associated protein D                   | Rat         | Bronchoalveolar fluid | Aging          | 30     |
| Serine protease inhibitor A3K                               | Rat         | Bronchoalveolar fluid | Aging          | 30     |
| Serine protease inhibitor A3L                               | Rat         | Bronchoalveolar fluid | Aging          | 30     |
| Serotransferrin                                             | Rat         | Bronchoalveolar fluid | Aging          | 30     |
| Cationic trypsin-3                                          | Rat         | Bronchoalveolar fluid | Aging          | 30     |
| Vitamin D-binding protein                                   | Rat         | Bronchoalveolar fluid | Aging          | 30     |
| Desmin                                                      | Rat         | Skeletal muscle       | Diabetes       | 31     |
| Actin, alpha skeletal muscle                                | Rat         | Skeletal muscle       | Diabetes       | 31     |
| Myosin light chain 1/2, skeletal muscle isoform             | Rat         | Skeletal muscle       | Diabetes       | 31     |
| Heat shock-related 70 kDa protein 2                         | Rat         | Glaucoma              | Eyes           | 32     |

## Supplementary References

1. Martínez, A., Portero-Otín, M., Pamplona, R., & Ferrer, I. (2006). Protein targets of oxidative damage in human neurodegenerative diseases with abnormal protein aggregates. *Brain pathology* 20(2), 281-57.
2. Sultana, R., Perluigi, M., Butterfield, AL. (2006). Protein Oxidation and Lipid Peroxidation in Brain of Subjects with Alzheimer's Disease: Insights into Mechanism of Neurodegeneration from redox Proteomics. *Antioxidants & Redox Signaling* 8(12), 1933-1944.
3. Gómez, A., & Ferrer, I. (2005). Increased oxidation of certain glycolysis and energy metabolism enzymes in the frontal cortex in Lewy body diseases. *Journal of neuroscience research*, 87(4), 602-13.
4. Castegna, A., Aksenov, M., Thongboonkerd, V., Klein, J. B., Pierce, W. M., Booze, R., Markesbery, W. R., et al. (2002). Proteomic identification of oxidatively modified proteins in Alzheimer's disease. Brain. Part II dihydropyrimidinase-related protein 2, alpha-enolase and heat shock cognate. *Journal of Neurochemistry* 71, 1517-1527.
5. Lee, Y. M., Park, S. H., Shin, D.I., Hwang, J.-Y., Park, B., Park, Y.-J., Lee, T. H., et al. (2008). Oxidative modification of peroxiredoxin is associated with drug-induced apoptotic signaling in experimental models of Parkinson disease. *Journal of Neurochemistry* 105, 103-113.
6. Pamplona, R., Dalfó, E., Ayala, V., Bellmunt, M. J., PRat, J., Ferrer, I., & Portero-Otín, M. (2005). Proteins in Human Brain cortex are modified by oxidation, glycooxidation, and lipoxidation. Effects of Alzheimer disease and identification of lipoxidation targets. *The Journal of biological chemistry*, 280(15), 14515-30.
7. Korolainen, M. a, Goldsteins, G., Nyman, T. a, Alafuzoff, I., Koistinaho, J., & Pirttilä, T. (2006). Oxidative modification of proteins in the frontal cortex of Alzheimer's disease Brain. *Neurobiology of aging*, 27(1), 42-53.
8. Choi, J., Malakowsky, C. A., Talent, J. M., Conrad, C. C., & Gracy, R. W. (2002). Identification of oxidized plasma proteins in Alzheimer's disease. *Biochemical & Biophysical Research Communications*. 293, 1566-1570.
9. Butterfield, D. A., Poon, H. F., St Clair, D., Keller, J. N., Pierce, W. M., Klein, J. B., & Markesbery, W. R. (2006). Redox proteomics identification of oxidatively modified hippocampal proteins in mild cognitive impairment: insights into the development of Alzheimer's disease. *Neurobiology of disease*, 15(2), 153-32.
10. Sultana, R., Boyd-Kimball, D., Poon, H. F., Cai, J., Pierce, W. M., Klein, J. B., Merchant, M., et al. (2006). Redox proteomics identification of oxidized proteins in Alzheimer's disease hippocampus and Cerebellum: an approach to understand pathological and biochemical alterations in AD. *Neurobiology of aging*, 27(11), 1564-76.
11. Reed, T., Perluigi, M., Sultana, R., Pierce, W. M., Klein, J. B., Turner, D. M., Coccia, R., et al. (2008). Redox proteomic identification of 4-hydroxy-2-nonenal-modified Brain proteins in amnesic mild cognitive impairment: insight into the role of lipid peroxidation in the progression and pathogenesis of Alzheimer's disease. *Neurobiology of aging*, 29(12), 1913-1923.
12. Choi, J., Forster, M. J., McDonald, S. R., Weintraub, S. T., Carroll, C. a, & Gracy, R. W. (2004). Proteomic identification of specific oxidized proteins in ApoE-knockout mice: relevance to Alzheimer's disease. *Free radical biology & medicine*, 47(1), 10-20.
13. Boyd-Kimball, D., Sultana, R., Poon, H. F., Lynn, B. C., Casamenti, F., Pepeu, G., Klein, J. B., et al. (2006). Proteomic identification of proteins specifically oxidized by intracerebral injection of amyloid beta-peptide (1-42) into Rat Brain: implications for Alzheimer's disease. *Neuroscience*, 132(2), 313-17.
14. Castegna, A., Aksenov, M., Thongboonkerd, V., Klein, J. B., Pierce, W. M., Booze, R., Markesbery, W. R., et al. (2002). Proteomic identification of oxidatively modified proteins in Alzheimer's disease Brain. Part II: creatine kinase BB, glutamine synthase and ubiquitin carboxy terminal hydrolase. *Free radical biology & medicine*, 33(4), 562-571.
15. Argüelles, S., Cano, M., Machado, A., & Ayala, A. (2011). Effect of aging and oxidative stress on elongation factor-2 in hypothalamus and hypophysis. *Mechanisms of ageing and development*, 132(1-2), 554.

16. Sorolla, M. A., Reverter-Branchat, G., Tamarit, J., Ferrer, I., Ros, J., & Cabisco, E. (2008). Proteomic and oxidative stress analysis in Human Brain samples of Huntington disease. *Free radical biology & medicine*, 45(5), 667-78.
17. Poon, H. F., Vaishnav, R. a, Getchell, T. V., Getchell, M. L., & Butterfield, D. A. (2006). Quantitative proteomics analysis of differential protein expression and oxidative modification of specific proteins in the Brains of old Mice.
18. Rabek, J. P., Boylston III, W. H., & Papaconstantinou, J. (2003). Carbonylation of ER chaperone proteins in aged mouse liver. *Biochemical and Biophysical Research Communications*, 305(3), 566-572.
19. Poon, H. F., Farr, S. a, Banks, W. a, Pierce, W. M., Klein, J. B., Morley, J. E., & Butterfield, D. A. (2005). Proteomic identification of less oxidized Brain proteins in aged senescence-accelerated mice following administration of antisense oligonucleotide directed at the Abeta region of amyloid precursor protein. *Molecular Brain research*,
20. Poon, H. F., Castegna, a, Farr, S. a, Thongboonkerd, V., Lynn, B. C., Banks, W. a, Morley, J. E., et al. (2004). Quantitative proteomics analysis of specific protein expression and oxidative modification in aged senescence-
21. Chaudhuri, A. R., de Waal, E. M., Pierce, A., Van Remmen, H., Ward, W. F., & Richardson, A. (2006). Detection of protein carbonyls in aging liver tissue: A fluorescence-based proteomic approach. *Mechanisms of ageing and*
22. Perluigi, M., Fai Poon, H., Hensley, K., Pierce, W. M., Klein, J. B., Calabrese, V., De Marco, C., et al. (2005). Proteomic analysis of 4-hydroxy-2-nonenal-modified proteins in G93A-SOD1 transgenic mice model of familial amyotrophic lateral sclerosis. *Free radical biology & medicine*, 38(7), 960-8.
23. Sorolla, M. A., Rodríguez-Colman, M. J., Tamarit, J., Ortega, Z., Lucas, J. J., Ferrer, I., Ros, J., et al. (2010). Protein oxidation in Huntington disease affects energy production and vitamin B6 metabolism. *Free radical biology &*
24. Aluise, C. D., Robinson, R. a S., Beckett, T. L., Murphy, M. P., Cai, J., Pierce, W. M., Markesbery, W. R., et al. (2010). Preclinical Alzheimer disease: Brain oxidative stress, Abeta peptide and proteomics. *Neurobiology of disease*,
25. Reed, T. T., Pierce, W. M., Markesbery, W. R., & Butterfield, D. A. (2009). Proteomic identification of HNE-bound proteins in early Alzheimer disease: Insights into the role of lipid peroxidation in th progression of AD. *Brain research*,
26. Aksenov, M. Y., Aksenova, M. V., Butterfield, D. a., Geddes, J. W., & Markesbery, W. R. (2001). Protein oxidation in the Brain in Alzheimer's disease. *Neuroscience*, 103(2), 373-383.
27. Alzheimer, E., Perluigi, M., Newman, S. F., & Pierce, W. M. (2010). Redox Proteomic Analysis of Carbonylated Brain Proteins in Mild Cognitive Impairment. *Antioxidant & Redox Signaling*, 12(3), 327-336.
28. Nabeshi, H., Oikawa, S., Inoue, S., Nishino, K., & Kawanishi, S. (2006). Proteomic analysis for protein carbonyl as an indicator of oxidative damage in senescence-accelerated Mice. *Free radical research*, 40(11), 1173-81.
29. Wang, Q., Zhao, X., He, S., Liu, Y., An, M., & Ji, J. (2010). Differential proteomics analysis of specific carbonylated proteins in the temporal cortex of aged Rats: the deterioration of antioxidant system. *Neurochemical*
30. Umstead, T. M., Freeman, W. M., Chinchilli, V. M., & Phelps, D. S. (2009). Age-related changes in the expression and oxidation of Bronchoalveolar lavage proteins in the Rat. *American journal of physiology*, 296(1), L14-29.
31. Oh-Ishi M, Ueno T & Maeda T. (2003). Proteomic method detects oxidatively induced protein carbonyls in muscles of a diabetes model otsuka long-evans tokushima fatty rat. *Free Radical Biology & Medicine*, 34(1), 11-22.
32. Tezel, G., Yang, X., & Cai, J. (2005). Proteomic identification of oxidatively modified retinal proteins in a chronic pressure-induced rat model of glaucoma. *Investigative ophthalmology & visual science*, 46(9), 3177-87.
33. Ferrante, R. J., Browne, S. E., Shinobu, L. a, Bowling, a C., Baik, M. J., MacGarvey, U., Kowall, N. W., et al. (1997). Evidence of increased oxidative damage in both sporadic and familial amyotrophic lateral sclerosis. *Journal of*

34. Reed, T. T. (2011). Lipid peroxidation and neurodegenerative disease. *Free radical biology & medicine*, 51(7), 1302
35. Sultana R, Newman SF, Abdul HM, Cai J, Pierce WM, Klein JB et al (2006) Protective effect of D609 against amyloid-beta1-42-induced oxidative modification of neuronal proteins: redox proteomics study. *Journal of*
36. Choi J, Sullards MC, Olzmann JA, Rees HD, Weintraub ST, Bostwick DE et al (2006). Oxidative damage of DJ-1 is linked to sporadic Parkinson and Alzheimer diseases. *Journal of Biological Chemistry* 281:10816–10824.
37. Shin SJ, Lee SE, Boo JH, Kim M, Yoon YD, Kim SI, Mook-Jung I (2004). Profiling proteins related to amyloid deposited Brain of Tg2576 Mice. *Proteomics* 4:3359–3368.
38. Dalfó E, Ferrer I (2008). Early  $\alpha$ -synuclein lipoxidation in neocortex in Lewy body diseases. *Neurobiology of*
39. Ilieva EV, Naudí A, Kichev A, Ferrer I, Pamplona R, Portero-Otín M (2010). Loss of the Stress Transducers Nrf2 and Grp78/BiP in Pick's Disease. *Free Radical Biology & medicine* 15:48(10):1302-10.
40. Chinta SJ, Andersen JK (2008). Redox imbalance in Parkinson's disease. *Biochemical et Biophysical Acta*
41. Meany DL, Xie H, Thompson LV, Arriaga EA, Griffin TJ (2007). Identification of carbonylated proteins from enriched rat skeletal muscle mitochondria using affinity chromatography-stable isotope labeling and tandem mass
42. Hamelin M, Mary J, Vostry M, Friguet B, Bakala H. (2007). Glycation damage targets glutamate dehydrogenase in the rat liver mitochondrial matrix during aging. *FEBS J.* 274(22): 5949-61.
